# Supplementary material
Source: publisher site journal article supplement (https://www.dovepress.com/article/499783)
Supplement: Supplementary file 1 [file 499783-Revised-Supplementary-Material.docx]

# Supplementary Material


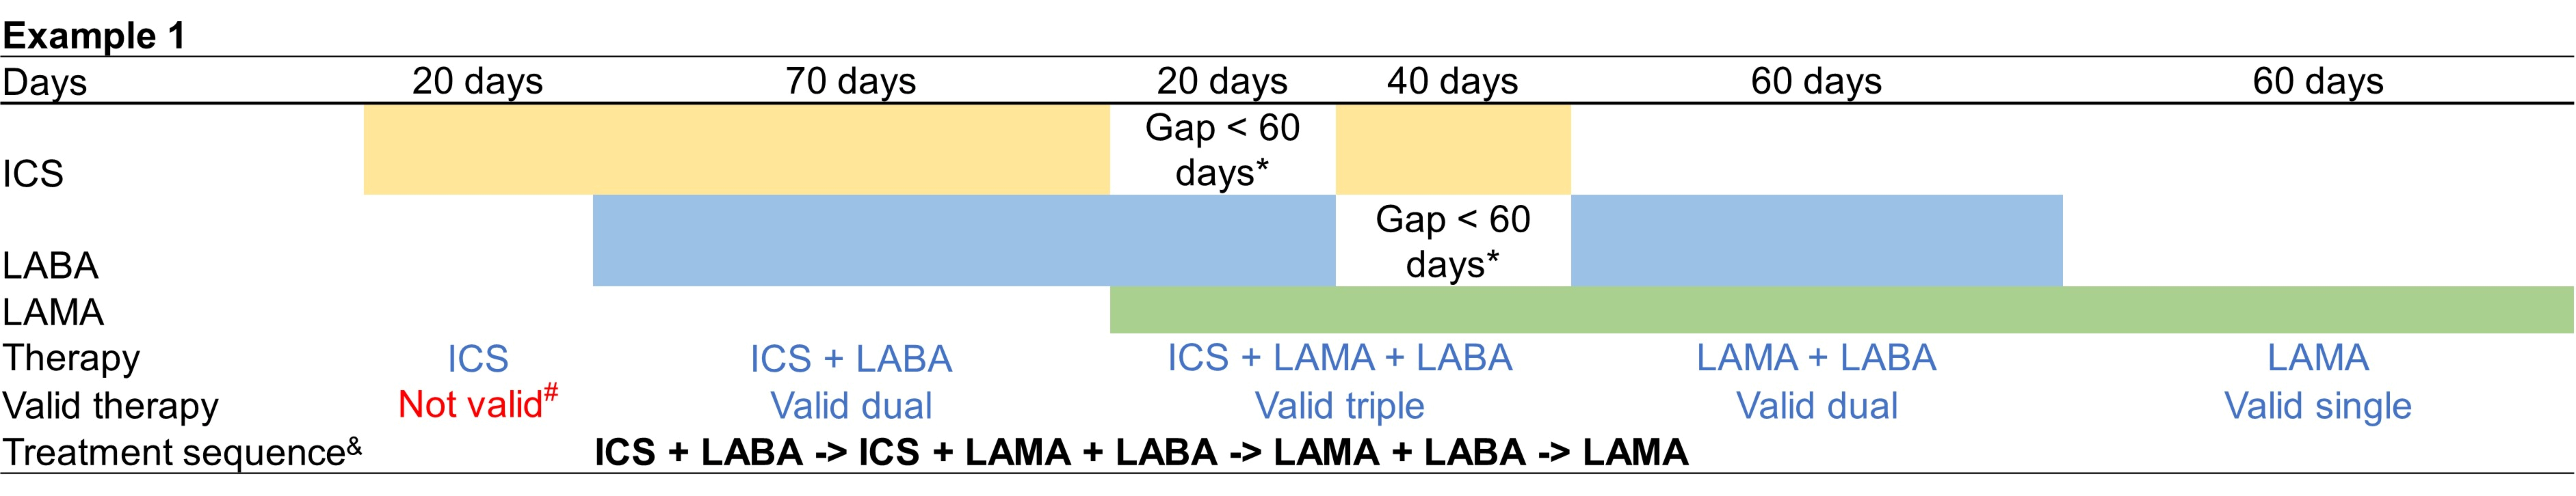


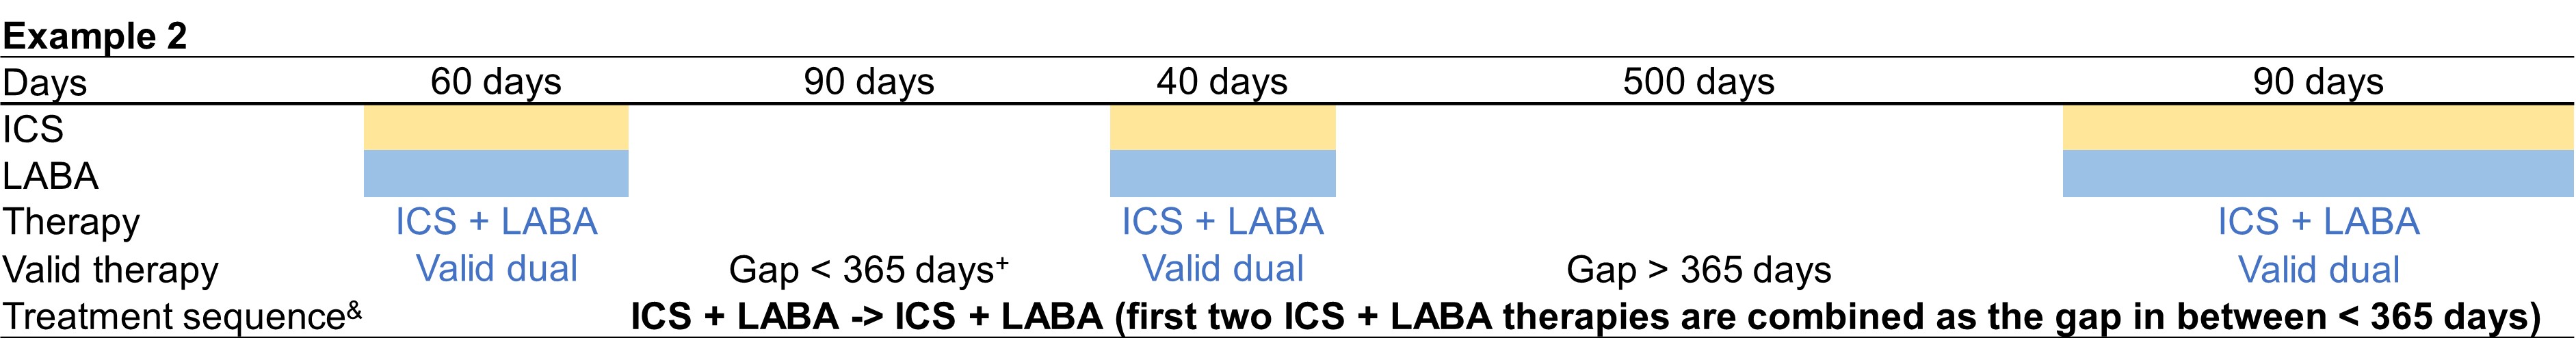


**Supplementary Figure S1:** Examples of graphical description for valid COPD treatment therapies (single/dual/triple) and treatment sequences.

*: If the gap between two consecutive prescriptions of the same drug class was ≤ 60 days, the prescriptions were combined and counted as one prescription.

#: A valid single/dual/triple therapy should last for at least 30 days.

+: Repeated therapies given in consecutive sequence were collapsed if the gap in-between was less than 365 days.

&: Treatment sequence included valid single/dual/triple therapies from the index date until the first instance of triple therapy or the end of follow-up, whichever came first.

Abbreviations: ICS (Inhaled Corticosteroids), LAMA (Long-acting Muscarinic Antagonists), LABA (Long-Acting β2 Agonists).

**Supplementary Table S1:** Treatment sequences of all valid single/dual/triple therapies

| **Treatment sequence*** | **n (%) N = 7888** |
| --- | --- |
| ICS+LABA | 2371 (30.06%) |
| ICS+LAMA+LABA | 902 (11.44%) |
| ICS | 823 (10.43%) |
| ICS+LABA -> ICS+LAMA+LABA | 598 (7.58%) |
| ICS+LABA -> ICS+LABA | 444 (5.63%) |
| LAMA | 434 (5.50%) |
| LAMA+LABA | 210 (2.66%) |
| LAMA -> ICS+LAMA+LABA | 189 (2.40%) |
| ICS+LABA -> ICS | 181 (2.29%) |
| ICS -> ICS+LABA | 122 (1.55%) |
| ICS+LABA -> ICS+LABA -> ICS+LAMA+LABA | 108 (1.37%) |
| LAMA -> ICS+LABA | 89 (1.13%) |
| ICS+LABA -> ICS+LABA -> ICS+LABA | 71 (0.90%) |
| ICS -> ICS+LAMA+LABA | 64 (0.81%) |
| ICS -> ICS | 62 (0.79%) |
| ICS+LABA -> LAMA | 51 (0.65%) |
| ICS+LABA -> LAMA -> ICS+LAMA+LABA | 51 (0.65%) |
| ICS+LABA -> LAMA+LABA | 49 (0.62%) |
| ICS+LABA -> ICS -> ICS+LABA | 44 (0.56%) |
| LAMA -> ICS+LABA -> ICS+LAMA+LABA | 42 (0.53%) |
| LAMA -> LAMA | 41 (0.52%) |
| ICS -> ICS+LABA -> ICS+LAMA+LABA | 40 (0.51%) |
| ICS -> ICS+LABA -> ICS | 31 (0.39%) |
| LAMA+LABA -> ICS+LAMA+LABA | 28 (0.35%) |
| ICS+LABA -> ICS -> ICS+LAMA+LABA | 26 (0.33%) |
| ICS+LABA -> ICS+LABA -> ICS | 25 (0.32%) |
| LAMA -> ICS | 21 (0.27%) |
| ICS+LABA -> ICS -> ICS+LABA -> ICS+LAMA+LABA | 19 (0.24%) |
| ICS -> ICS+LABA -> ICS+LABA | 18 (0.23%) |
| ICS -> LAMA | 18 (0.23%) |
| LAMA -> LAMA+LABA | 18 (0.23%) |
| ICS+LABA -> LAMA -> ICS+LABA | 17 (0.22%) |
| ICS+LABA -> LAMA+LABA -> ICS+LAMA+LABA | 15 (0.19%) |
| LAMA+LABA -> ICS | 15 (0.19%) |
| ICS+LABA -> ICS -> ICS+LABA -> ICS | 14 (0.18%) |
| ICS+LABA -> ICS+LABA -> ICS+LABA -> ICS+LAMA+LABA | 14 (0.18%) |
| ICS+LABA -> LAMA -> ICS+LABA -> ICS+LAMA+LABA | 14 (0.18%) |
| LAMA -> ICS+LABA -> LAMA | 14 (0.18%) |
| LAMA -> ICS+LABA -> ICS+LABA | 13 (0.16%) |
| LAMA+LABA -> ICS+LABA | 13 (0.16%) |
| ICS -> LAMA+LABA | 12 (0.15%) |
| ICS+LABA -> ICS+LABA -> ICS+LABA -> ICS+LABA | 12 (0.15%) |
| LAMA -> ICS+LABA -> LAMA -> ICS+LAMA+LABA | 12 (0.15%) |
| ICS+LABA -> LAMA+LABA -> ICS+LABA | 11 (0.14%) |
| ICS -> ICS+LABA -> ICS -> ICS+LABA | 10 (0.13%) |
| ICS+LABA -> ICS -> ICS+LABA -> ICS -> ICS+LABA | 9 (0.11%) |
| ICS+LABA -> ICS+LABA -> LAMA | 9 (0.11%) |
| LAMA -> LAMA -> ICS+LAMA+LABA | 9 (0.11%) |
| ICS -> ICS+LABA -> ICS -> ICS+LAMA+LABA | 8 (0.10%) |
| ICS+LABA -> ICS+LABA -> ICS -> ICS+LABA | 8 (0.10%) |
| LAMA -> LAMA -> ICS+LABA | 8 (0.10%) |
| ICS -> ICS+LABA -> ICS+LABA -> ICS | 7 (0.09%) |
| ICS+LABA -> ICS -> ICS | 7 (0.09%) |
| ICS+LABA -> ICS -> ICS+LABA -> ICS -> ICS+LABA -> ICS | 7 (0.09%) |
| ICS+LABA -> ICS -> LAMA+LABA | 7 (0.09%) |
| ICS+LABA -> ICS+LABA -> LAMA+LABA | 7 (0.09%) |
| LAMA -> ICS+LABA -> LAMA -> ICS+LABA | 7 (0.09%) |
| ICS -> ICS+LABA -> ICS+LABA -> ICS+LAMA+LABA | 6 (0.08%) |
| ICS -> LAMA -> ICS | 6 (0.08%) |
| ICS+LABA -> ICS+LABA -> ICS+LABA -> ICS | 6 (0.08%) |
| ICS+LABA -> ICS+LABA -> LAMA -> ICS+LAMA+LABA | 6 (0.08%) |
| ICS+LABA -> LAMA -> LAMA | 6 (0.08%) |
| ICS -> ICS -> ICS | 5 (0.06%) |
| ICS+LABA -> ICS -> ICS+LABA -> ICS+LABA | 5 (0.06%) |
| ICS+LABA -> ICS+LABA -> ICS -> ICS+LAMA+LABA | 5 (0.06%) |
| LAMA -> ICS+LABA -> ICS | 5 (0.06%) |
| LAMA -> ICS+LABA -> LAMA+LABA | 5 (0.06%) |
| LAMA -> LAMA+LABA -> ICS+LAMA+LABA | 5 (0.06%) |
| LAMA -> LAMA+LABA -> LAMA | 5 (0.06%) |
| ICS -> ICS -> ICS+LABA | 4 (0.05%) |
| ICS -> ICS+LABA -> ICS -> ICS+LABA -> ICS | 4 (0.05%) |
| ICS -> ICS+LABA -> ICS+LABA -> ICS+LABA | 4 (0.05%) |
| ICS -> ICS+LABA -> LAMA -> ICS+LAMA+LABA | 4 (0.05%) |
| ICS -> LAMA+LABA -> ICS+LAMA+LABA | 4 (0.05%) |
| ICS+LABA -> ICS -> ICS+LABA -> ICS -> ICS+LAMA+LABA | 4 (0.05%) |
| ICS+LABA -> ICS+LABA -> LAMA -> ICS+LABA | 4 (0.05%) |
| ICS+LABA -> ICS+LABA -> LAMA+LABA -> ICS+LAMA+LABA | 4 (0.05%) |
| ICS+LABA -> LAMA -> LAMA+LABA | 4 (0.05%) |
| ICS+LABA -> LAMA+LABA -> ICS | 4 (0.05%) |
| ICS+LAMA -> LAMA | 4 (0.05%) |
| LAMA -> ICS+LABA -> ICS+LABA -> ICS | 4 (0.05%) |
| LAMA -> ICS+LABA -> LAMA -> LAMA+LABA | 4 (0.05%) |
| LAMA+LABA -> ICS+LABA -> ICS | 4 (0.05%) |
| LAMA+LABA -> ICS+LABA -> LAMA+LABA | 4 (0.05%) |
| ICS -> ICS -> ICS+LABA -> ICS+LAMA+LABA | 3 (0.04%) |
| ICS -> ICS -> ICS+LAMA+LABA | 3 (0.04%) |
| ICS -> ICS+LABA -> ICS -> ICS+LABA -> ICS+LAMA+LABA | 3 (0.04%) |
| ICS -> ICS+LABA -> ICS+LABA -> ICS -> ICS+LABA | 3 (0.04%) |
| ICS -> ICS+LABA -> LAMA | 3 (0.04%) |
| ICS -> LAMA -> ICS+LAMA+LABA | 3 (0.04%) |
| ICS -> LAMA -> LAMA | 3 (0.04%) |
| ICS+LABA -> ICS -> ICS+LABA -> ICS -> ICS+LABA -> ICS -> ICS+LABA | 3 (0.04%) |
| ICS+LABA -> ICS -> LAMA | 3 (0.04%) |
| ICS+LABA -> ICS+LABA -> LAMA -> ICS+LABA -> ICS+LAMA+LABA | 3 (0.04%) |
| ICS+LABA -> ICS+LABA -> LAMA+LABA -> ICS+LABA | 3 (0.04%) |
| ICS+LAMA | 3 (0.04%) |
| LAMA -> ICS -> ICS+LAMA+LABA | 3 (0.04%) |
| LAMA -> ICS+LABA -> ICS+LABA -> ICS+LAMA+LABA | 3 (0.04%) |
| LAMA -> ICS+LABA -> LAMA -> ICS+LABA -> ICS+LAMA+LABA | 3 (0.04%) |
| LAMA -> ICS+LAMA -> ICS+LAMA+LABA | 3 (0.04%) |
| LAMA+LABA -> ICS -> ICS+LAMA+LABA | 3 (0.04%) |
| LAMA+LABA -> LAMA | 3 (0.04%) |
| ICS -> ICS -> ICS+LABA -> ICS | 2 (0.03%) |
| ICS -> ICS -> ICS+LABA -> ICS -> ICS+LABA | 2 (0.03%) |
| ICS -> ICS -> ICS+LABA -> ICS+LABA -> ICS | 2 (0.03%) |
| ICS -> ICS -> LAMA+LABA | 2 (0.03%) |
| ICS -> ICS+LABA -> ICS -> ICS+LABA -> ICS -> ICS+LABA | 2 (0.03%) |
| ICS -> ICS+LABA -> ICS -> ICS+LABA -> ICS -> ICS+LABA -> ICS | 2 (0.03%) |
| ICS -> ICS+LABA -> ICS+LABA -> ICS -> ICS+LABA -> ICS -> ICS+LABA | 2 (0.03%) |
| ICS -> ICS+LABA -> ICS+LABA -> LAMA | 2 (0.03%) |
| ICS -> ICS+LABA -> ICS+LAMA -> ICS+LAMA+LABA | 2 (0.03%) |
| ICS -> ICS+LAMA | 2 (0.03%) |
| ICS+LABA -> ICS -> ICS -> ICS+LABA | 2 (0.03%) |
| ICS+LABA -> ICS -> ICS+LABA -> ICS -> ICS+LABA -> ICS+LAMA+LABA | 2 (0.03%) |
| ICS+LABA -> ICS -> ICS+LABA -> LAMA -> ICS+LAMA+LABA | 2 (0.03%) |
| ICS+LABA -> ICS -> ICS+LABA -> LAMA+LABA | 2 (0.03%) |
| ICS+LABA -> ICS -> ICS+LABA -> LAMA+LABA -> ICS+LAMA+LABA | 2 (0.03%) |
| ICS+LABA -> ICS -> LAMA -> ICS+LABA | 2 (0.03%) |
| ICS+LABA -> ICS+LABA -> ICS -> ICS+LABA -> ICS -> ICS+LAMA+LABA | 2 (0.03%) |
| ICS+LABA -> ICS+LABA -> ICS+LABA -> ICS -> ICS+LABA | 2 (0.03%) |
| ICS+LABA -> ICS+LABA -> ICS+LABA -> ICS -> ICS+LABA -> ICS | 2 (0.03%) |
| ICS+LABA -> LAMA -> ICS | 2 (0.03%) |
| ICS+LABA -> LAMA -> ICS+LABA -> ICS+LABA | 2 (0.03%) |
| ICS+LABA -> LAMA -> LAMA+LABA -> ICS+LAMA+LABA | 2 (0.03%) |
| ICS+LABA -> LAMA -> LAMA+LABA -> LAMA | 2 (0.03%) |
| ICS+LAMA -> ICS+LAMA+LABA | 2 (0.03%) |
| LAMA -> ICS -> ICS+LABA -> ICS+LAMA+LABA | 2 (0.03%) |
| LAMA -> ICS+LABA -> ICS -> ICS+LABA | 2 (0.03%) |
| LAMA -> ICS+LABA -> ICS -> ICS+LAMA+LABA | 2 (0.03%) |
| LAMA -> ICS+LAMA -> LAMA | 2 (0.03%) |
| LAMA -> LAMA -> ICS | 2 (0.03%) |
| LAMA -> LAMA -> ICS+LABA -> ICS+LAMA+LABA | 2 (0.03%) |
| LAMA -> LAMA -> LAMA | 2 (0.03%) |
| LAMA -> LAMA+LABA -> ICS+LABA | 2 (0.03%) |
| LAMA+LABA -> LAMA+LABA | 2 (0.03%) |
| ICS -> ICS -> ICS -> ICS+LAMA+LABA | 1 (0.01%) |
| ICS -> ICS -> ICS+LABA -> ICS -> ICS+LABA -> ICS+LAMA+LABA | 1 (0.01%) |
| ICS -> ICS -> ICS+LABA -> ICS+LABA | 1 (0.01%) |
| ICS -> ICS -> ICS+LABA -> LAMA+LABA | 1 (0.01%) |
| ICS -> ICS -> ICS+LAMA -> LAMA | 1 (0.01%) |
| ICS -> ICS -> LAMA | 1 (0.01%) |
| ICS -> ICS -> LAMA -> ICS+LABA | 1 (0.01%) |
| ICS -> ICS -> LAMA+LABA -> ICS+LAMA+LABA | 1 (0.01%) |
| ICS -> ICS+LABA -> ICS -> ICS | 1 (0.01%) |
| ICS -> ICS+LABA -> ICS -> ICS+LABA -> ICS -> ICS+LABA -> ICS -> ICS+LABA | 1 (0.01%) |
| ICS -> ICS+LABA -> ICS -> ICS+LABA -> ICS -> ICS+LABA -> ICS -> ICS+LABA -> ICS | 1 (0.01%) |
| ICS -> ICS+LABA -> ICS -> LAMA -> ICS+LABA -> ICS -> ICS+LAMA | 1 (0.01%) |
| ICS -> ICS+LABA -> ICS -> LAMA -> ICS+LAMA+LABA | 1 (0.01%) |
| ICS -> ICS+LABA -> ICS+LABA -> ICS -> ICS+LABA -> ICS -> ICS+LABA -> ICS+LAMA+LABA | 1 (0.01%) |
| ICS -> ICS+LABA -> ICS+LABA -> ICS -> ICS+LABA -> ICS+LAMA+LABA | 1 (0.01%) |
| ICS -> ICS+LABA -> ICS+LABA -> ICS -> ICS+LABA -> LAMA+LABA | 1 (0.01%) |
| ICS -> ICS+LABA -> ICS+LABA -> ICS -> LAMA+LABA -> ICS+LAMA+LABA | 1 (0.01%) |
| ICS -> ICS+LABA -> ICS+LABA -> ICS+LABA -> ICS+LABA -> ICS+LABA | 1 (0.01%) |
| ICS -> ICS+LABA -> ICS+LABA -> ICS+LABA -> LAMA -> ICS+LABA -> LAMA -> ICS+LAMA+LABA | 1 (0.01%) |
| ICS -> ICS+LABA -> LAMA -> ICS -> LAMA -> LAMA+LABA | 1 (0.01%) |
| ICS -> ICS+LABA -> LAMA -> ICS+LABA | 1 (0.01%) |
| ICS -> ICS+LABA -> LAMA -> ICS+LABA -> ICS | 1 (0.01%) |
| ICS -> ICS+LABA -> LAMA -> LAMA+LABA -> ICS+LAMA+LABA | 1 (0.01%) |
| ICS -> ICS+LABA -> LAMA+LABA | 1 (0.01%) |
| ICS -> ICS+LABA -> LAMA+LABA -> ICS+LAMA+LABA | 1 (0.01%) |
| ICS -> ICS+LAMA -> ICS | 1 (0.01%) |
| ICS -> ICS+LAMA -> ICS -> ICS+LABA | 1 (0.01%) |
| ICS -> ICS+LAMA -> ICS -> ICS+LAMA -> ICS -> ICS+LAMA -> ICS -> ICS+LAMA -> ICS -> ICS+LAMA -> ICS -> ICS+LAMA -> LAMA -> ICS -> ICS+LAMA+LABA | 1 (0.01%) |
| ICS -> ICS+LAMA -> ICS -> LAMA -> ICS -> ICS+LAMA -> LAMA -> ICS -> LAMA -> ICS+LAMA -> LAMA -> ICS+LAMA -> ICS | 1 (0.01%) |
| ICS -> ICS+LAMA -> ICS -> LAMA -> ICS+LAMA -> ICS -> LAMA -> ICS | 1 (0.01%) |
| ICS -> ICS+LAMA -> ICS+LAMA+LABA | 1 (0.01%) |
| ICS -> ICS+LAMA -> LAMA -> ICS+LABA | 1 (0.01%) |
| ICS -> LAMA -> ICS -> ICS | 1 (0.01%) |
| ICS -> LAMA -> ICS -> ICS -> LAMA | 1 (0.01%) |
| ICS -> LAMA -> ICS+LABA | 1 (0.01%) |
| ICS -> LAMA -> ICS+LABA -> ICS | 1 (0.01%) |
| ICS -> LAMA -> ICS+LABA -> ICS+LAMA+LABA | 1 (0.01%) |
| ICS -> LAMA -> ICS+LABA -> LAMA -> ICS -> LAMA | 1 (0.01%) |
| ICS -> LAMA -> ICS+LAMA -> ICS -> ICS | 1 (0.01%) |
| ICS -> LAMA -> ICS+LAMA -> ICS+LAMA+LABA | 1 (0.01%) |
| ICS -> LAMA+LABA -> ICS | 1 (0.01%) |
| ICS -> LAMA+LABA -> ICS -> LAMA+LABA | 1 (0.01%) |
| ICS+LABA -> ICS -> ICS -> ICS+LABA -> ICS -> ICS+LABA | 1 (0.01%) |
| ICS+LABA -> ICS -> ICS -> ICS+LABA -> ICS+LAMA -> ICS+LAMA+LABA | 1 (0.01%) |
| ICS+LABA -> ICS -> ICS -> ICS+LABA -> ICS+LAMA+LABA | 1 (0.01%) |
| ICS+LABA -> ICS -> ICS -> LAMA -> ICS -> ICS+LAMA+LABA | 1 (0.01%) |
| ICS+LABA -> ICS -> ICS -> LAMA+LABA | 1 (0.01%) |
| ICS+LABA -> ICS -> ICS+LABA -> ICS -> ICS | 1 (0.01%) |
| ICS+LABA -> ICS -> ICS+LABA -> ICS -> ICS+LABA -> ICS -> ICS+LABA -> ICS | 1 (0.01%) |
| ICS+LABA -> ICS -> ICS+LABA -> ICS -> ICS+LABA -> ICS+LABA -> ICS | 1 (0.01%) |
| ICS+LABA -> ICS -> ICS+LABA -> ICS -> LAMA | 1 (0.01%) |
| ICS+LABA -> ICS -> ICS+LABA -> ICS -> LAMA+LABA -> ICS+LAMA+LABA | 1 (0.01%) |
| ICS+LABA -> ICS -> ICS+LABA -> ICS+LABA -> ICS | 1 (0.01%) |
| ICS+LABA -> ICS -> ICS+LABA -> ICS+LABA -> ICS+LAMA+LABA | 1 (0.01%) |
| ICS+LABA -> ICS -> ICS+LABA -> ICS+LAMA -> ICS | 1 (0.01%) |
| ICS+LABA -> ICS -> ICS+LAMA -> ICS -> ICS+LABA -> ICS | 1 (0.01%) |
| ICS+LABA -> ICS -> ICS+LAMA -> LAMA | 1 (0.01%) |
| ICS+LABA -> ICS -> ICS+LAMA -> LAMA+LABA | 1 (0.01%) |
| ICS+LABA -> ICS -> LAMA -> ICS | 1 (0.01%) |
| ICS+LABA -> ICS -> LAMA -> ICS+LABA -> ICS | 1 (0.01%) |
| ICS+LABA -> ICS -> LAMA -> ICS+LABA -> LAMA -> ICS -> ICS+LAMA+LABA | 1 (0.01%) |
| ICS+LABA -> ICS -> LAMA -> ICS+LAMA+LABA | 1 (0.01%) |
| ICS+LABA -> ICS -> LAMA+LABA -> ICS | 1 (0.01%) |
| ICS+LABA -> ICS -> LAMA+LABA -> ICS+LABA | 1 (0.01%) |
| ICS+LABA -> ICS -> LAMA+LABA -> LAMA -> ICS+LAMA+LABA | 1 (0.01%) |
| ICS+LABA -> ICS+LABA -> ICS -> ICS | 1 (0.01%) |
| ICS+LABA -> ICS+LABA -> ICS -> ICS+LABA -> ICS | 1 (0.01%) |
| ICS+LABA -> ICS+LABA -> ICS -> ICS+LABA -> ICS -> ICS+LABA -> ICS | 1 (0.01%) |
| ICS+LABA -> ICS+LABA -> ICS -> ICS+LABA -> ICS+LAMA+LABA | 1 (0.01%) |
| ICS+LABA -> ICS+LABA -> ICS -> ICS+LAMA -> ICS+LAMA+LABA | 1 (0.01%) |
| ICS+LABA -> ICS+LABA -> ICS -> LAMA | 1 (0.01%) |
| ICS+LABA -> ICS+LABA -> ICS+LABA -> ICS -> ICS+LABA -> ICS -> ICS+LABA -> ICS+LAMA+LABA | 1 (0.01%) |
| ICS+LABA -> ICS+LABA -> ICS+LABA -> LAMA | 1 (0.01%) |
| ICS+LABA -> ICS+LABA -> ICS+LABA -> LAMA -> ICS+LABA -> ICS+LABA -> ICS+LAMA+LABA | 1 (0.01%) |
| ICS+LABA -> ICS+LABA -> ICS+LABA -> LAMA+LABA | 1 (0.01%) |
| ICS+LABA -> ICS+LABA -> ICS+LABA -> LAMA+LABA -> ICS+LAMA+LABA | 1 (0.01%) |
| ICS+LABA -> ICS+LABA -> ICS+LAMA -> LAMA -> ICS+LABA | 1 (0.01%) |
| ICS+LABA -> ICS+LABA -> ICS+LAMA -> LAMA -> ICS+LAMA+LABA | 1 (0.01%) |
| ICS+LABA -> ICS+LABA -> LAMA -> ICS+LABA -> ICS+LABA | 1 (0.01%) |
| ICS+LABA -> ICS+LABA -> LAMA -> ICS+LABA -> LAMA -> ICS+LABA -> LAMA -> ICS+LAMA+LABA | 1 (0.01%) |
| ICS+LABA -> ICS+LABA -> LAMA -> ICS+LABA -> LAMA+LABA | 1 (0.01%) |
| ICS+LABA -> ICS+LABA -> LAMA+LABA -> ICS | 1 (0.01%) |
| ICS+LABA -> ICS+LABA -> LAMA+LABA -> ICS+LABA -> ICS+LAMA+LABA | 1 (0.01%) |
| ICS+LABA -> ICS+LABA -> LAMA+LABA -> ICS+LABA -> LAMA | 1 (0.01%) |
| ICS+LABA -> ICS+LAMA -> ICS+LAMA+LABA | 1 (0.01%) |
| ICS+LABA -> ICS+LAMA -> LAMA | 1 (0.01%) |
| ICS+LABA -> ICS+LAMA -> LAMA -> ICS+LABA -> ICS | 1 (0.01%) |
| ICS+LABA -> ICS+LAMA -> LAMA -> ICS+LAMA -> LAMA | 1 (0.01%) |
| ICS+LABA -> ICS+LAMA -> LAMA+LABA | 1 (0.01%) |
| ICS+LABA -> LAMA -> ICS -> ICS | 1 (0.01%) |
| ICS+LABA -> LAMA -> ICS -> ICS+LABA | 1 (0.01%) |
| ICS+LABA -> LAMA -> ICS -> ICS+LABA -> ICS -> ICS+LABA -> ICS | 1 (0.01%) |
| ICS+LABA -> LAMA -> ICS -> LAMA -> ICS+LAMA+LABA | 1 (0.01%) |
| ICS+LABA -> LAMA -> ICS -> LAMA -> LAMA+LABA | 1 (0.01%) |
| ICS+LABA -> LAMA -> ICS -> LAMA -> LAMA+LABA -> ICS+LAMA+LABA | 1 (0.01%) |
| ICS+LABA -> LAMA -> ICS+LABA -> ICS | 1 (0.01%) |
| ICS+LABA -> LAMA -> ICS+LABA -> ICS -> ICS+LABA | 1 (0.01%) |
| ICS+LABA -> LAMA -> ICS+LABA -> ICS -> ICS+LABA -> ICS+LAMA+LABA | 1 (0.01%) |
| ICS+LABA -> LAMA -> ICS+LABA -> ICS -> ICS+LAMA+LABA | 1 (0.01%) |
| ICS+LABA -> LAMA -> ICS+LABA -> ICS+LABA -> ICS+LAMA+LABA | 1 (0.01%) |
| ICS+LABA -> LAMA -> ICS+LABA -> ICS+LAMA -> ICS+LABA -> ICS+LAMA+LABA | 1 (0.01%) |
| ICS+LABA -> LAMA -> ICS+LABA -> LAMA | 1 (0.01%) |
| ICS+LABA -> LAMA -> ICS+LABA -> LAMA -> ICS+LABA | 1 (0.01%) |
| ICS+LABA -> LAMA -> ICS+LABA -> LAMA -> ICS+LAMA+LABA | 1 (0.01%) |
| ICS+LABA -> LAMA -> ICS+LABA -> LAMA+LABA -> ICS+LAMA+LABA | 1 (0.01%) |
| ICS+LABA -> LAMA -> ICS+LAMA | 1 (0.01%) |
| ICS+LABA -> LAMA -> ICS+LAMA -> LAMA -> ICS+LABA -> ICS+LAMA+LABA | 1 (0.01%) |
| ICS+LABA -> LAMA -> LAMA -> ICS | 1 (0.01%) |
| ICS+LABA -> LAMA -> LAMA -> ICS+LAMA -> ICS+LAMA+LABA | 1 (0.01%) |
| ICS+LABA -> LAMA -> LAMA -> ICS+LAMA+LABA | 1 (0.01%) |
| ICS+LABA -> LAMA -> LAMA+LABA -> ICS+LABA | 1 (0.01%) |
| ICS+LABA -> LAMA -> LAMA+LABA -> LAMA -> ICS+LAMA | 1 (0.01%) |
| ICS+LABA -> LAMA+LABA -> ICS+LABA -> ICS | 1 (0.01%) |
| ICS+LABA -> LAMA+LABA -> ICS+LABA -> ICS+LAMA+LABA | 1 (0.01%) |
| ICS+LABA -> LAMA+LABA -> ICS+LABA -> LAMA+LABA -> ICS -> LAMA+LABA | 1 (0.01%) |
| ICS+LABA -> LAMA+LABA -> ICS+LABA -> LAMA+LABA -> ICS+LABA | 1 (0.01%) |
| ICS+LAMA -> ICS -> ICS+LABA -> ICS | 1 (0.01%) |
| ICS+LAMA -> ICS -> ICS+LAMA -> ICS+LAMA+LABA | 1 (0.01%) |
| ICS+LAMA -> ICS+LABA -> ICS | 1 (0.01%) |
| ICS+LAMA -> LAMA -> ICS | 1 (0.01%) |
| ICS+LAMA -> LAMA -> ICS -> ICS+LAMA -> LAMA -> ICS -> ICS+LABA | 1 (0.01%) |
| ICS+LAMA -> LAMA -> ICS+LABA | 1 (0.01%) |
| ICS+LAMA -> LAMA -> ICS+LAMA+LABA | 1 (0.01%) |
| ICS+LAMA -> LAMA+LABA | 1 (0.01%) |
| LAMA -> ICS -> ICS | 1 (0.01%) |
| LAMA -> ICS -> ICS -> ICS+LABA -> ICS -> ICS+LAMA+LABA | 1 (0.01%) |
| LAMA -> ICS -> ICS+LABA | 1 (0.01%) |
| LAMA -> ICS -> ICS+LABA -> ICS | 1 (0.01%) |
| LAMA -> ICS -> ICS+LABA -> LAMA -> ICS+LABA -> LAMA | 1 (0.01%) |
| LAMA -> ICS -> ICS+LABA -> LAMA -> ICS+LAMA+LABA | 1 (0.01%) |
| LAMA -> ICS -> ICS+LAMA -> ICS -> ICS+LAMA+LABA | 1 (0.01%) |
| LAMA -> ICS -> ICS+LAMA -> LAMA | 1 (0.01%) |
| LAMA -> ICS -> LAMA | 1 (0.01%) |
| LAMA -> ICS -> LAMA -> ICS -> LAMA | 1 (0.01%) |
| LAMA -> ICS -> LAMA -> ICS+LABA | 1 (0.01%) |
| LAMA -> ICS -> LAMA -> ICS+LAMA -> ICS | 1 (0.01%) |
| LAMA -> ICS -> LAMA -> ICS+LAMA+LABA | 1 (0.01%) |
| LAMA -> ICS -> LAMA+LABA | 1 (0.01%) |
| LAMA -> ICS -> LAMA+LABA -> ICS | 1 (0.01%) |
| LAMA -> ICS+LABA -> ICS -> ICS+LABA -> ICS | 1 (0.01%) |
| LAMA -> ICS+LABA -> ICS -> ICS+LABA -> ICS -> ICS+LABA -> ICS+LAMA+LABA | 1 (0.01%) |
| LAMA -> ICS+LABA -> ICS -> ICS+LABA -> ICS+LAMA+LABA | 1 (0.01%) |
| LAMA -> ICS+LABA -> ICS -> ICS+LABA -> LAMA -> ICS+LAMA+LABA | 1 (0.01%) |
| LAMA -> ICS+LABA -> ICS -> ICS+LABA -> LAMA -> LAMA -> ICS+LAMA+LABA | 1 (0.01%) |
| LAMA -> ICS+LABA -> ICS -> LAMA+LABA | 1 (0.01%) |
| LAMA -> ICS+LABA -> ICS+LABA -> ICS -> ICS+LABA -> ICS | 1 (0.01%) |
| LAMA -> ICS+LABA -> ICS+LABA -> ICS+LABA | 1 (0.01%) |
| LAMA -> ICS+LABA -> ICS+LABA -> LAMA -> ICS -> LAMA -> ICS -> ICS+LAMA+LABA | 1 (0.01%) |
| LAMA -> ICS+LABA -> LAMA -> ICS+LABA -> ICS+LABA -> ICS+LABA | 1 (0.01%) |
| LAMA -> ICS+LABA -> LAMA -> ICS+LABA -> ICS+LABA -> ICS+LABA -> ICS+LABA | 1 (0.01%) |
| LAMA -> ICS+LABA -> LAMA -> ICS+LABA -> LAMA -> ICS -> ICS+LAMA+LABA | 1 (0.01%) |
| LAMA -> ICS+LABA -> LAMA -> ICS+LABA -> LAMA+LABA | 1 (0.01%) |
| LAMA -> ICS+LABA -> LAMA -> ICS+LAMA -> LAMA | 1 (0.01%) |
| LAMA -> ICS+LABA -> LAMA -> LAMA -> ICS+LAMA+LABA | 1 (0.01%) |
| LAMA -> ICS+LABA -> LAMA+LABA -> ICS+LAMA+LABA | 1 (0.01%) |
| LAMA -> ICS+LAMA -> ICS -> ICS+LAMA+LABA | 1 (0.01%) |
| LAMA -> ICS+LAMA -> LAMA -> ICS+LABA -> ICS+LAMA+LABA | 1 (0.01%) |
| LAMA -> ICS+LAMA -> LAMA -> ICS+LAMA -> LAMA | 1 (0.01%) |
| LAMA -> ICS+LAMA -> LAMA -> ICS+LAMA+LABA | 1 (0.01%) |
| LAMA -> ICS+LAMA -> LAMA -> LAMA+LABA -> ICS+LAMA+LABA | 1 (0.01%) |
| LAMA -> ICS+LAMA -> LAMA+LABA | 1 (0.01%) |
| LAMA -> LAMA -> ICS+LABA -> ICS -> ICS+LABA -> ICS+LAMA+LABA | 1 (0.01%) |
| LAMA -> LAMA -> ICS+LABA -> ICS+LABA | 1 (0.01%) |
| LAMA -> LAMA -> ICS+LABA -> LAMA | 1 (0.01%) |
| LAMA -> LAMA -> ICS+LABA -> LAMA -> ICS+LAMA+LABA | 1 (0.01%) |
| LAMA -> LAMA -> ICS+LABA -> LAMA+LABA | 1 (0.01%) |
| LAMA -> LAMA -> ICS+LAMA | 1 (0.01%) |
| LAMA -> LAMA -> ICS+LAMA -> LAMA | 1 (0.01%) |
| LAMA -> LAMA -> ICS+LAMA -> LAMA -> ICS -> LAMA | 1 (0.01%) |
| LAMA -> LAMA -> LAMA+LABA | 1 (0.01%) |
| LAMA -> LAMA+LABA -> ICS+LABA -> ICS+LAMA+LABA | 1 (0.01%) |
| LAMA -> LAMA+LABA -> LAMA -> LAMA+LABA | 1 (0.01%) |
| LAMA+LABA -> ICS -> ICS+LABA -> ICS+LAMA+LABA | 1 (0.01%) |
| LAMA+LABA -> ICS+LABA -> ICS+LAMA+LABA | 1 (0.01%) |

*: Treatment sequence included valid single/dual/triple therapies from the index date until the first instance of triple therapy or the end of follow-up, whichever came first. Repeated therapies given in consecutive sequence were collapsed if the gap in-between was less than 365 days.

Abbreviations: ICS (Inhaled Corticosteroids), LAMA (Long-acting Muscarinic Antagonists), LABA (Long-Acting β2 Agonists).
